# Supplementary material
Source: Springer Nature journal article supplement (https://www.springermedizin.de/resource/supplementary/12967_2012_1471_MOESM3_ESM.pdf/9574766)

a

c

e

b

d

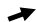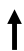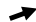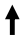

Supplement: MOESM3 [file 9574766]
